# Supplementary material for: Susceptibility to a sexually transmitted disease in a wild koala population shows heritable genetic variance but no inbreeding depression
Source: PubMed Central journal article supplement (PMC9826501; doi:10.1111/mec.16676), 2022-09-12
Supplement: MEC-31-5455-s001.pdf [file MEC-31-5455-s001.pdf]

## Supplemental Information for:

### Susceptibility to a sexually transmitted disease in a wild koala population shows heritable genetic variance but no inbreeding depression

Romane H Cristescu§, Kasha Strickland§\*, Anthony J Schultz, Loeske E B Kruuk, Deidre de Villiers, Céline H Frère

§ These authors contributed equally to the work

\* Corresponding author: [kasha.strickland@ed.ac.uk](mailto:kasha.strickland@ed.ac.uk)

#### Table of Contents:

|                  |            |
|------------------|------------|
| <b>Figure S1</b> | Page 2 - 4 |
| <b>Figure S2</b> | Page 5 - 7 |
| <b>Table S1</b>  | Page 8     |
| <b>Table S2</b>  | Page 9     |

**Figure S1.** Trace and density plots showing posterior distribution of parameter estimates for a model used to investigate the effect of internal relatedness, additive genetic effects, and shared environment effect on probability of testing positive for *C. pecorum*. “IR\_new” is internal relatedness, “Name” refers to the additive genetic effects, “Name2” refers to the shared environment effect. Residual variance (“Units”) was fixed at one.

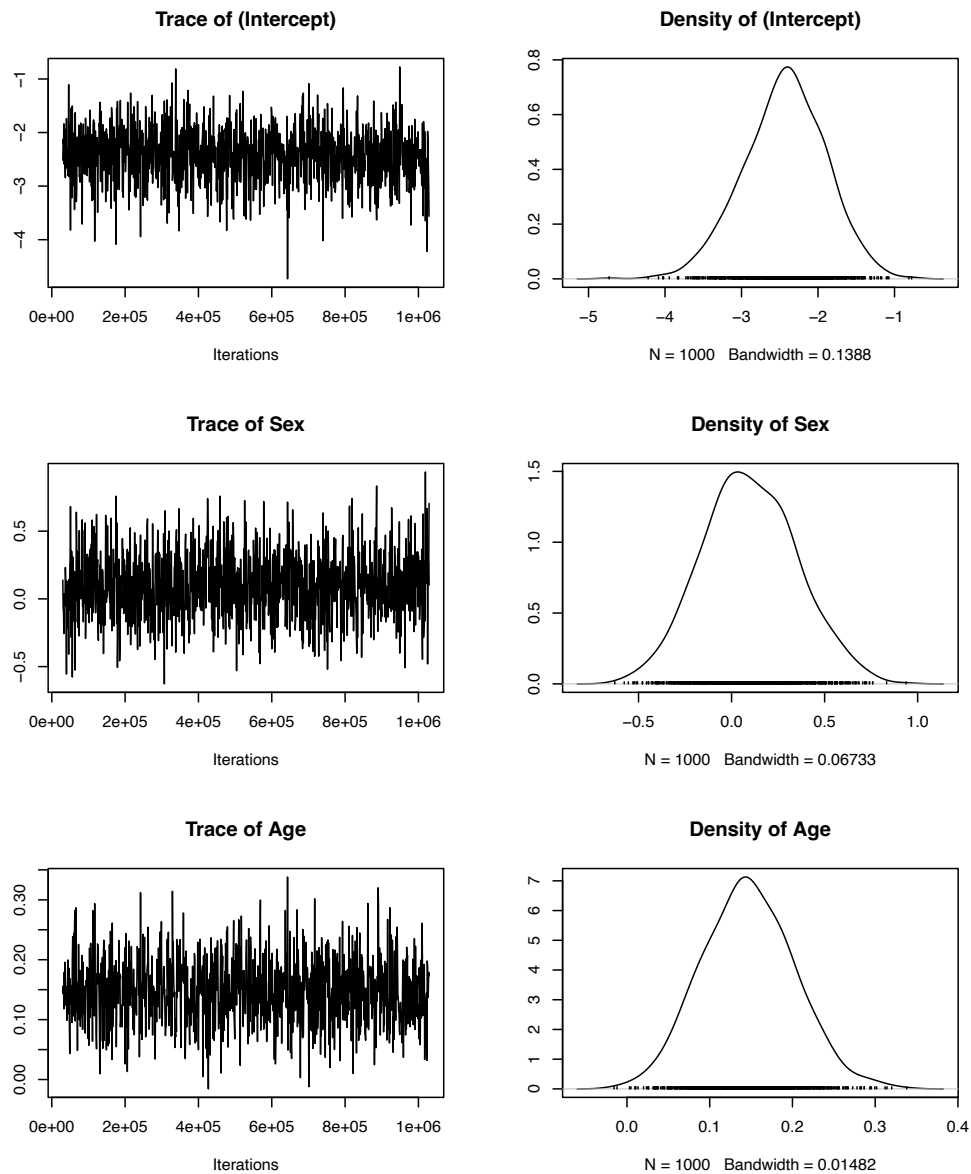

Trace of IR\_new

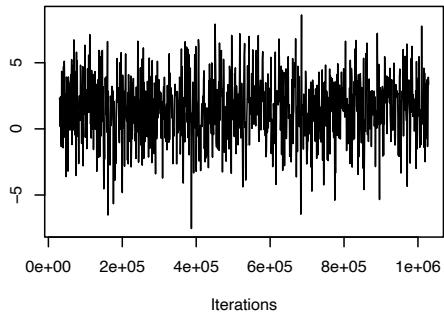

Density of IR\_new

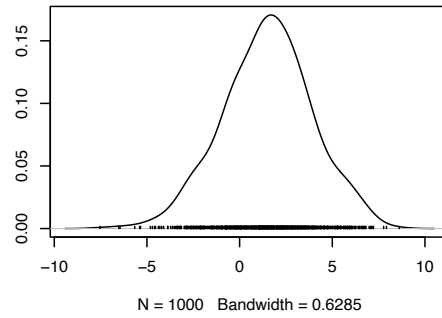

Trace of Breeding

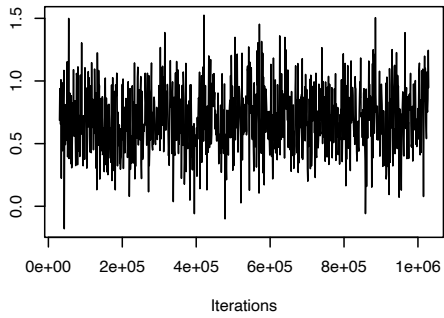

Density of Breeding

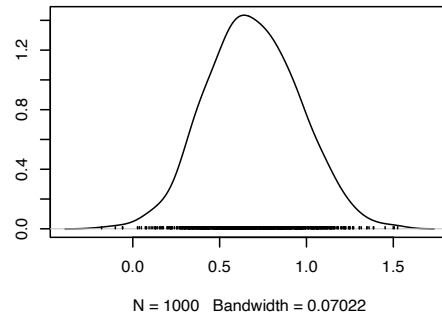

Trace of Age:IR\_new

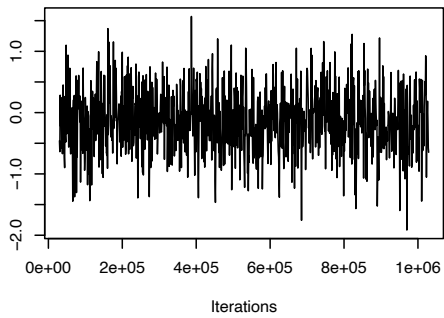

Density of Age:IR\_new

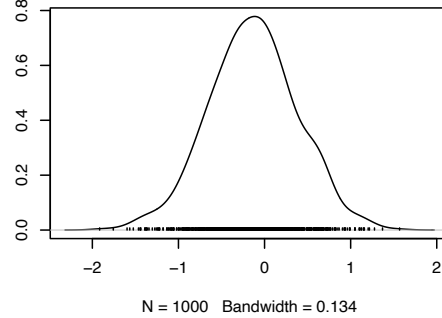

# MOLECULAR ECOLOGY

Trace of Name

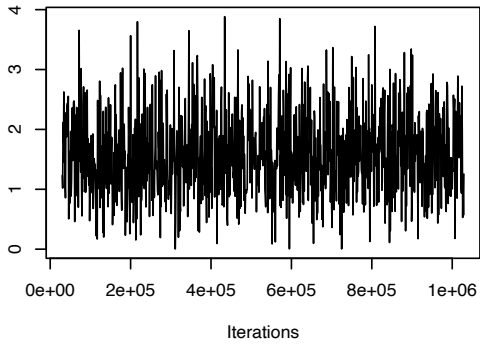

Density of Name

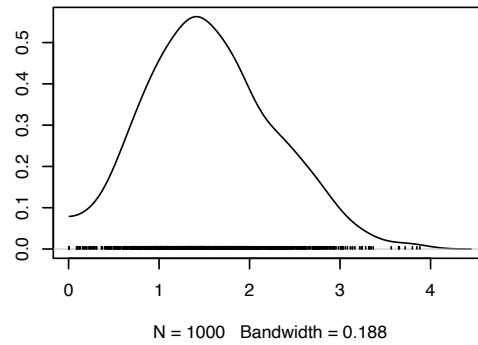

Trace of Name2

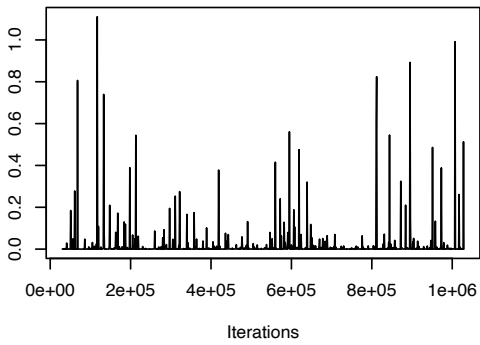

Density of Name2

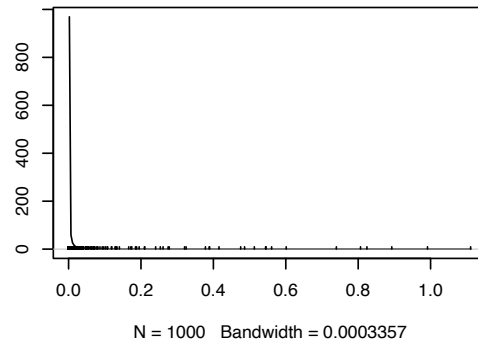

Trace of units

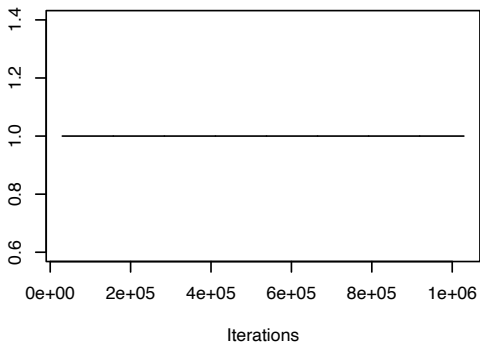

Density of units

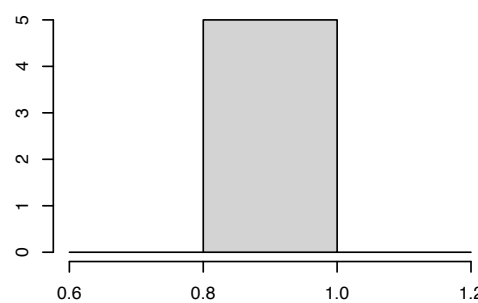

**Figure S2.** Trace and density plots showing posterior distribution of parameter estimates for a model used to investigate the effect of internal relatedness, additive genetic effects, and maternal effect on probability of testing positive for *C. pecorum*. “IR\_new” is internal relatedness, “Name” refers to the additive genetic effects, “maternal\_id” refers to the shared environment effect. Residual variance (“Units”) was fixed at one.

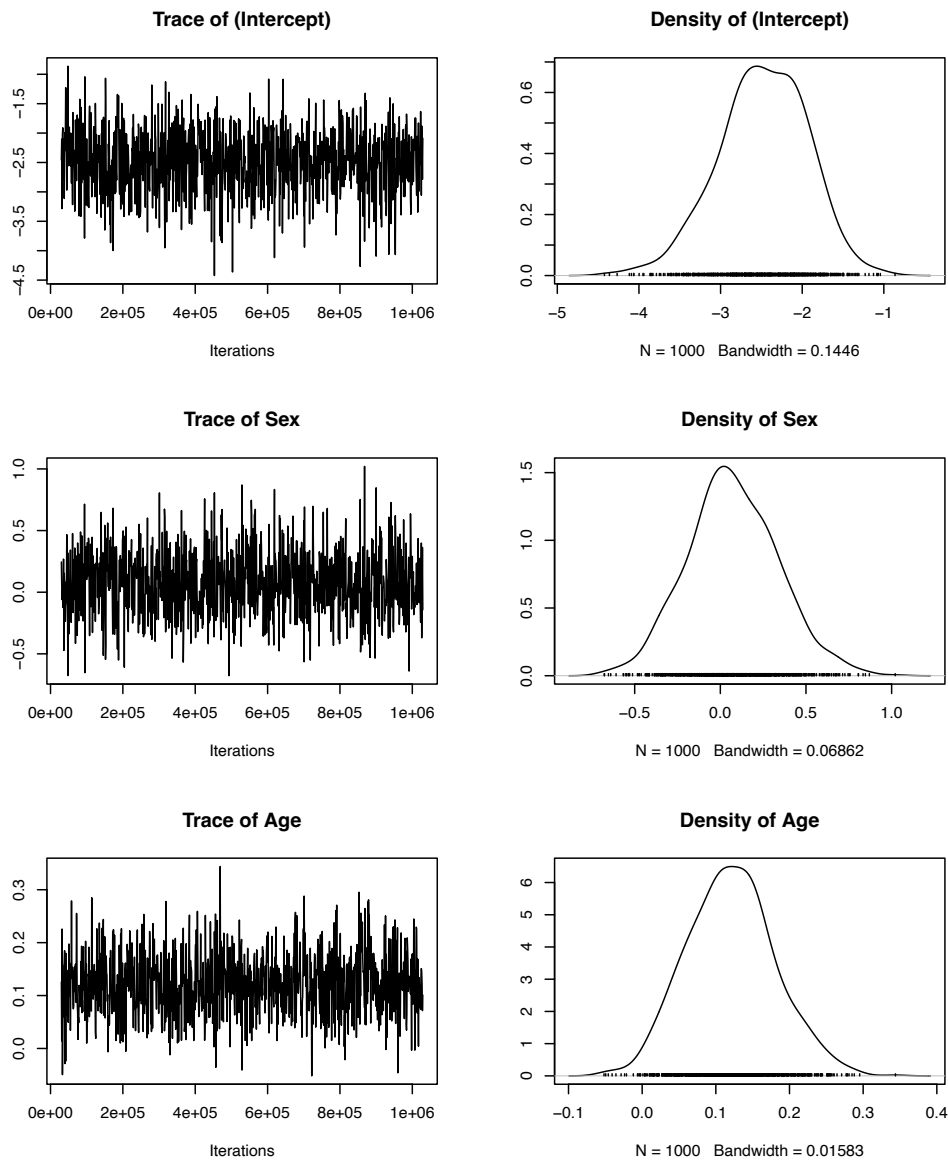

**Trace of IR\_new**

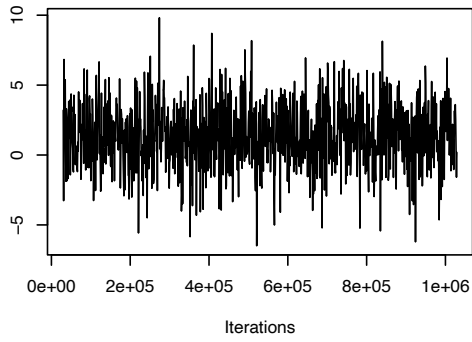

**Density of IR\_new**

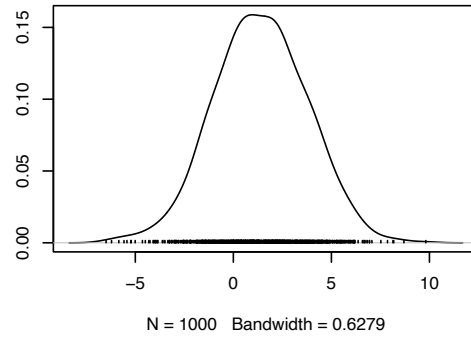

**Trace of Breeding**

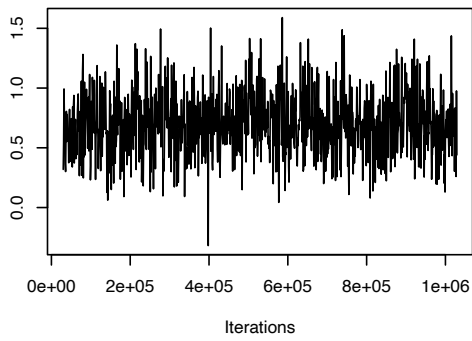

**Density of Breeding**

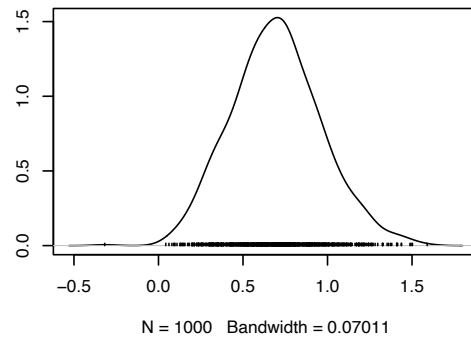

**Trace of Age:IR\_new**

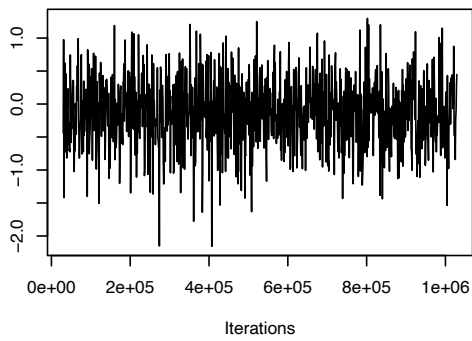

**Density of Age:IR\_new**

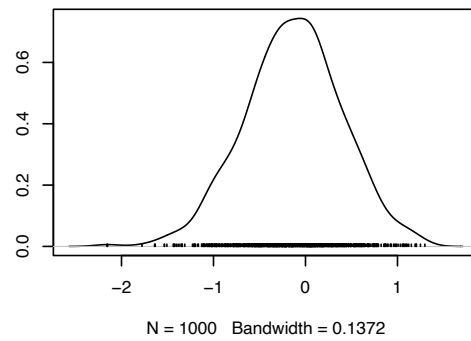

**Trace of Name**

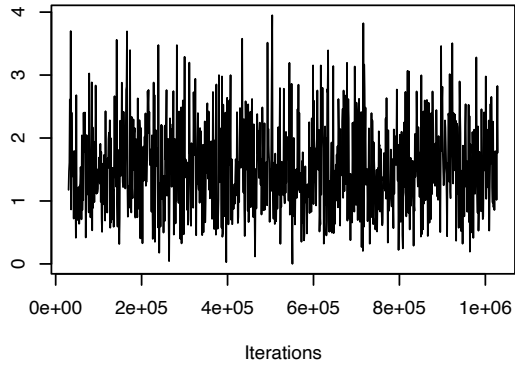

**Density of Name**

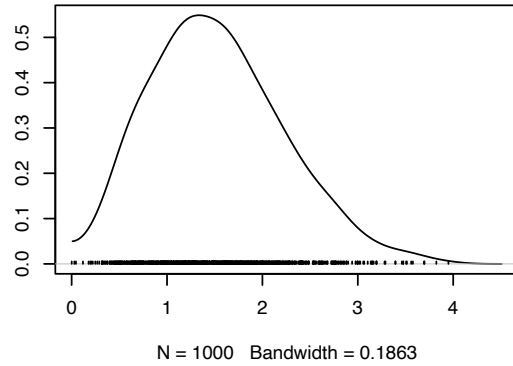

**Trace of maternal\_id**

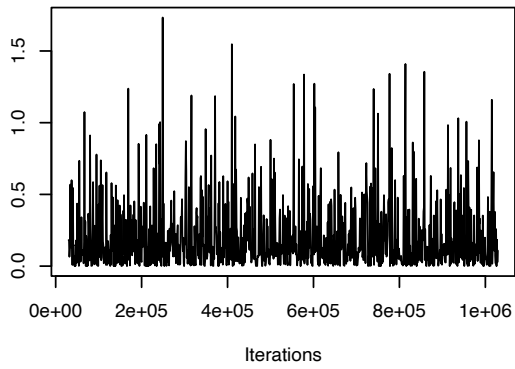

**Density of maternal\_id**

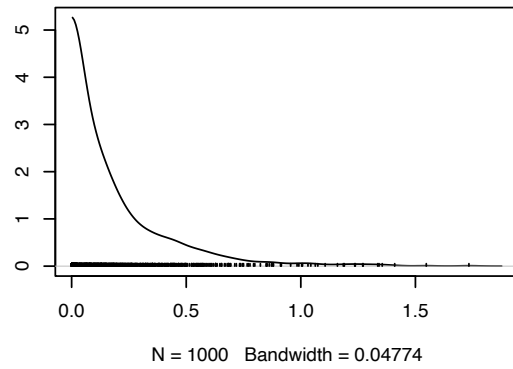

**Trace of units**

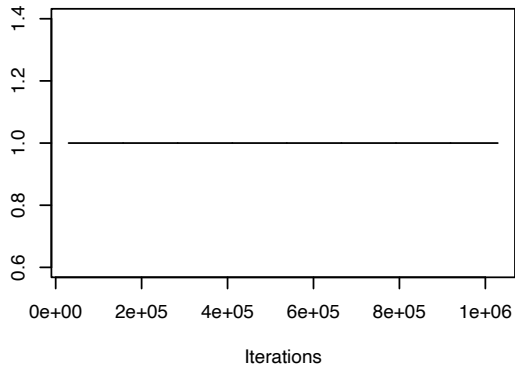

**Density of units**

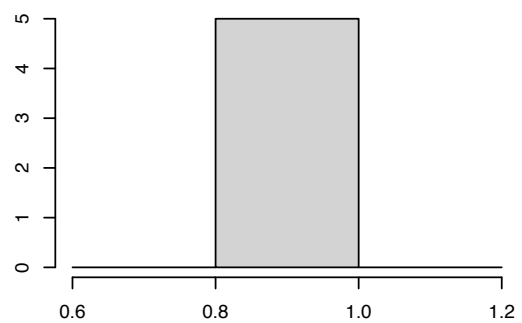

**Table S1.** Estimates for both fixed and random effects from a model used to investigate additive genetic effects for the probability of koalas testing positive for *Chlamydia pecorum*. Values in brackets are 95% credible intervals. Random effect variance estimates and genetic heritability ( $h^2$ ) are both presented on both latent and observed data-scale are presented. Parameters estimates were converted to the observed data-scale using QG<sub>GLMM</sub> package.

|                       |            |                            | <i>mode</i> | <i>Posterior distribution</i> |             |              |
|-----------------------|------------|----------------------------|-------------|-------------------------------|-------------|--------------|
|                       |            |                            |             | <i>mean</i>                   | <i>CI5%</i> | <i>CI95%</i> |
| <i>Fixed effects</i>  | $\beta$    | Intercept                  | -2.292      | -2.439                        | -3.441      | -1.4         |
|                       |            | Sex <sub>FEMALE</sub>      | 0.094       | 0.084                         | -0.396      | 0.59         |
|                       |            | Age                        | 0.145       | 0.152                         | 0.045       | 0.262        |
|                       |            | IR                         | 1.527       | 1.427                         | -3.293      | 5.912        |
|                       |            | Season <sub>BREEDING</sub> | 0.601       | 0.678                         | 0.119       | 1.2          |
|                       |            | Age*IR                     | -0.057      | -0.136                        | -1.189      | 0.829        |
| <i>Random effects</i> | Latent     | V <sub>A</sub>             | 1.614       | 1.627                         | 0.339       | 2.957        |
|                       | Data-scale | V <sub>A</sub>             | 0.006       | 0.015                         | 0.003       | 0.034        |
|                       | Latent     | $h^2$                      | 0.634       | 0.588                         | 0.336       | 0.741        |
|                       | Data-scale | $h^2$                      | 0.101       | 0.145                         | 0.066       | 0.243        |



**Table S2.** Estimates for both fixed and random effects from a model used to investigate maternal effects for the probability of koalas testing positive for *Chlamydia pecorum*. Values in brackets are 95% credible intervals. Random effect variance estimates presented on both latent and observed data-scale are presented. Parameters estimates were converted to the observed data-scale using QG<sub>GLMM</sub> package.

|                       |            | <i>Posterior distribution</i> |             |             |             |              |
|-----------------------|------------|-------------------------------|-------------|-------------|-------------|--------------|
|                       |            |                               | <i>mode</i> | <i>mean</i> | <i>CI5%</i> | <i>CI95%</i> |
| <i>Fixed effects</i>  | $\beta$    | Intercept                     | -1.779      | -1.861      | -2.592      | -1.194       |
|                       |            | Sex <sub>FEMALE</sub>         | 0.081       | 0.121       | -0.204      | 0.477        |
|                       |            | Age                           | 0.084       | 0.069       | -0.006      | 0.141        |
|                       |            | IR                            | 0.671       | 1.253       | -1.645      | 4.754        |
|                       |            | Season <sub>BREEDING</sub>    | 0.59        | 0.516       | 0.179       | 0.869        |
|                       |            | Age*IR                        | -0.061      | -0.162      | -0.835      | 0.431        |
| <i>Random effects</i> | Latent     | V <sub>ME</sub>               | 0.004       | 0.221       | <0.001      | 0.804        |
|                       | Data-scale | V <sub>ME</sub>               | <0.001      | 0.003       | <0.001      | 0.011        |
|                       | Latent     | ICC <sub>ME</sub>             | 0.003       | 0.151       | 0.003       | 0.445        |
|                       | Data-scale | ICC <sub>ME</sub>             | 0.001       | 0.031       | 0.001       | 0.097        |
